# Supplementary material
Source: publisher site journal article supplement (https://www.dovepress.com/article/283465)
Supplement: Supplementary file 1 [file get_supplementary_file.php]

**Supplemetary Materials**

**
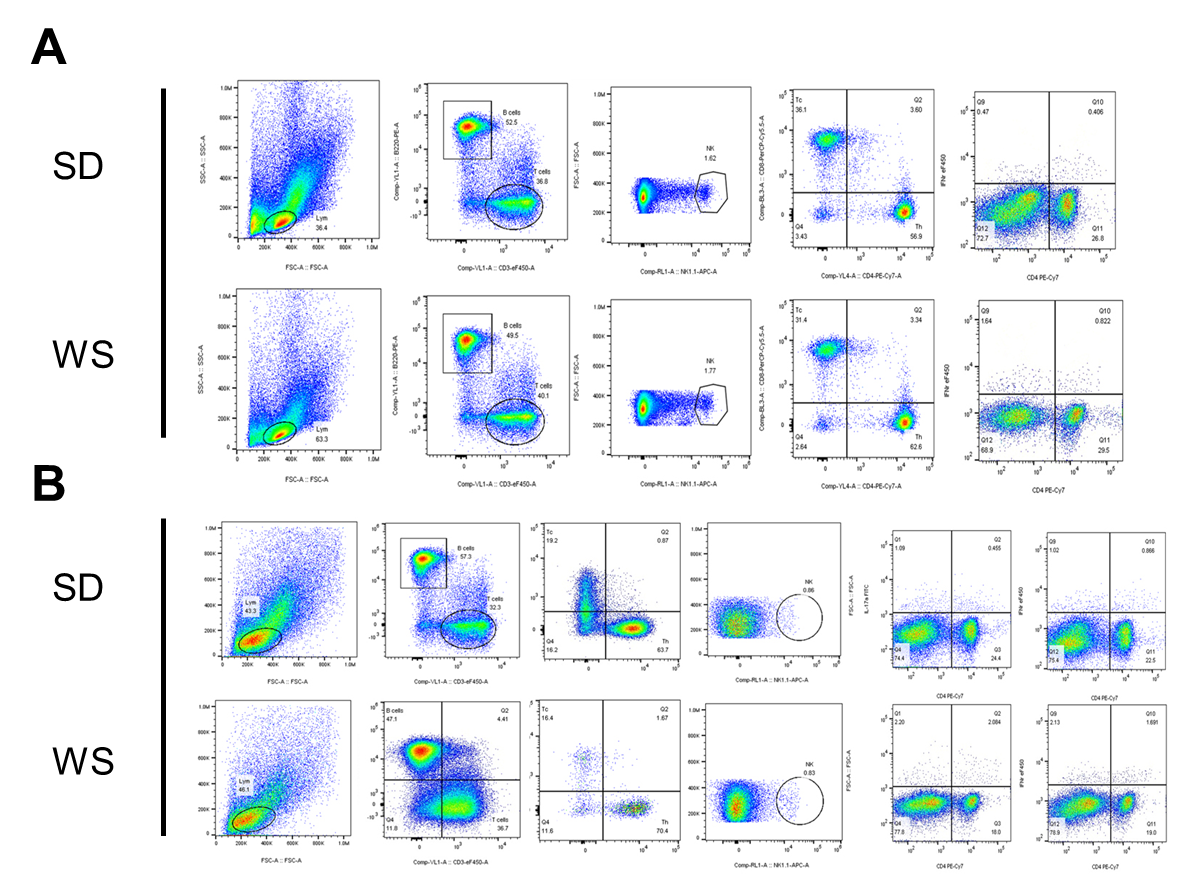
**

**Figure S1 The representative images of the flow cytometry.** The representative images of the proportions of immune cells in the tumor (A) and spleen (B). SD, standard diet group; WS, wushen group.

**Table S1 Antioxidant components in the functional food**

| **No.** | **Components** | **Content**  **(mg/100g)** | **Functions** |
| --- | --- | --- | --- |
| 1 | procyanidin | 244 | effectively clear free radical |
| 2 | anthocyanin | 15.87 | effectively clear free radical; antioxidant; tumor prevention |
| 3 | vitamin C | 24.4 | remit leucoderma; reduce cancer incidence; antioxidant |
| 4 | taurine | 9.39 | protect retina; protect myocardium; antioxidant; promote immune; promote lipid absorption |
| 5 | vitamin E | 6.72 | antioxidant; prevent free radical damage |
| 6 | lutein | 1.78 | antioxidant |
| 7 | squalene | 1.64 | improve SOD activity; enhance immunity; anti-aging; anti-hangover; anti-tumor |
| 8 | zeaxanthine | 236 | antioxidant |
| 9 | resveratrol | <0.3 | anti-tumor; protect cardiovascular system; antioxidant; resistance to free radicals; antibacterial; anti-aging |
| 10 | total flavone | 0.01 | protect hematopoietic system; protect immune system; clear free radical; antioxidant; protect DNA |

**Table S2 Immune-enhancing components in the functional food**

| **No.** | **Components** | **Content**  **(mg/100g)** | **Function** |
| --- | --- | --- | --- |
| 1 | polysaccharide | 12050 | promote bifidobacterium proliferation; inhibit pathogen; regulate gastrointestinal function; enhance immunity |
| 2 | squalene | 164 | improve SOD activity; enhance immunity; anti-aging; anti-hangover; anti-tumor |
| 3 | selenium | 16.9 | serum selenium level is associated with cancer incidence; enhance immunity |
| 4 | taurine | 9.39 | protect retina; protect myocardium; antioxidant; promote immune; promote lipid absorption |
| 5 | β-carotene | 1.47 | slow down aging; enhance immunity; cancer prevention |
| 6 | vitamin A | 0.007 | protect epithelial tissue cell; promote immune globulin synthesis; inhibit tumor growth; nutritional supplement |
| 7 | total flavone | 0.01 | protect hematopoietic system; protect immune system; clear free radical; antioxidant; protect DNA |

**Table S3 The main composition of the standard diet and functional food**

|  | **Standard diet (%)** | **Wushen (%)** |
| --- | --- | --- |
| **Protein** | 19 | 22.1 |
| **Fat** | 4 | 12.7 |
| **Carbohydrate** | 50 | 36.36 |
| **Fiber** | 5 | 21.7 |
| **Ash content** | 8 | 3.6 |
| **Water content** | <10.0 | 3.49 |
| **Calories per gram** | 3.12kcal | 3.91kcal |

**Table S4 The exact antibody information used in flow cytometry tests**

| **Antibody** | **Manufacturer** | **Article number** |
| --- | --- | --- |
| **anti-mouse CD4 FITC** | Thermo | 11-0042-82 |
| **anti-mouse Foxp3 PE** | Thermo | 12-5773-82 |
| **anti-mouse CD25 APC** | Thermo | 17-0251-82 |
| **anti-mouse NK1.1 APC** | BioLegend | 108710 |
| **anti-mouse CD3 eF450** | Thermo | 48-0031-82 |
| **anti-human/mouse B220 PE** | Thermo | 12-0452-81 |
| **anti-mouse CD4 PE-Cy7** | BioLegend | 100528 |
| **anti-mouse CD8a PerCP-Cy5.5** | Thermo | 45-0081-82 |
| **anti-mouse IL-17A AF488** | BioLegend | 506909 |
| **anti-mouse IL-4 APC** | Thermo | 17-7041-81 |
| **anti-mouse IFNr eF450** | Thermo | 48-7311-82 |

**Table S5 TOP 20 differential fecal metabolites between the Model group and the control group**

**Table S6 TOP 20 differential fecal metabolites between the FFD group and the Model group**

**Table S7 TOP 20 differential serum metabolites between the Model group and the control group**

**Table S8 TOP 20 differential serum metabolites between the FFD group and the Model group**
